# Supplementary material for: Retinoschisis and Norrie disease: a missing link
Source: BMC Res Notes. 2021 May 26;14:204. doi: 10.1186/s13104-021-05617-5 (PMC8157631; doi:10.1186/s13104-021-05617-5)
Supplement: Supplementary file 2 — Additional file 2: Table S1. Complete list of proteins identified in the RS1 immunoprecipitated complex analyzed by MALDI-TOF mass spectrometry. [file 13104_2021_5617_MOESM2_ESM.xlsx]

## Sheet: RS1
Complete list of proteins detected in the RS1 immunoprecipitation complex analyzed by MALDI-TOF mass spectrometry
Protein ID	Protein description	prot_score	prot_thresh	prot_expect	prot_mass	prot_matches	pep_query	pep_exp_mz	pep_exp_mr	pep_calc_mr	pep_delta	pep_start	pep_end	pep_miss	pep_res_before	pep_seq	pep_res_after	pep_var_mod	pep_var_mod_pos
ACTB_HUMAN	Actin, cytoplasmic 1 OS=Homo sapiens GN=ACTB PE=1 SV=1	72	56	0.0012	42052	16	2	631.353	630.346	630.37	-0.0243	192	196	0	K	ILTER	G
ACTC_HUMAN	Actin, alpha cardiac muscle 1 OS=Homo sapiens GN=ACTC1 PE=1 SV=1	48	56	0.32	42334	14	2	631.353	630.346	630.37	-0.0243	194	198	0	K	ILTER	G
CF206_HUMAN	Cilia- and flagella-associated protein 206 OS=Homo sapiens GN=CFAP206 PE=1 SV=2	36	56	5.3	71661	16	4	650.039	649.032	649.285	-0.2536	377	381	0	K	TDVCR	M
MBNL3_HUMAN	Muscleblind-like protein 3 OS=Homo sapiens GN=MBNL3 PE=1 SV=2	35	56	6.5	39361	2	5	8598.39	8597.38	8597.23	0.1524	271	353	0	R	SALEKPNGATPVFNPTVFHCQQALTNLQLPQPAFIPAGPILCMAPASNIVPMMHGATPTTVSAATTPATSVPFAAPTTGNQLK	F	6 Deamidated (NQ); Oxidation (M)	0.00000020000002000000220002020000000000000030000000000000000000000000000000000000000.0
HMN3_HUMAN	Humanin-like 3 OS=Homo sapiens GN=MTRNR2L3 PE=2 SV=1	34	56	8	2852	4	3	634.284	633.277	633.338	-0.0613	1	5	1	-	MATRR	F
AAMDC_HUMAN	Mth938 domain-containing protein OS=Homo sapiens GN=AAMDC PE=1 SV=1	33	56	9.7	13438	5	12	1122.66	1121.66	1121.6	0.0609	77	86	0	K	VPSSTVEYLK	K
KV105_HUMAN	Immunoglobulin kappa variable 1-5 OS=Homo sapiens GN=IGKV1-5 PE=1 SV=2	33	56	10	12944	4	15	2262.26	2261.25	2261.3	-0.0442	2	21	1	M	DMRVPAQLLGLLLLWLPGAK	C	Acetyl (Protein N-term); Oxidation (M)	1.02000000000000000000.0
RAB36_HUMAN	Ras-related protein Rab-36 OS=Homo sapiens GN=RAB36 PE=2 SV=2	31	56	16	36813	9	4	650.039	649.032	649.318	-0.2867	146	150	0	K	NVFDR	D
OTUL_HUMAN	Ubiquitin thioesterase otulin OS=Homo sapiens GN=OTULIN PE=1 SV=3	31	56	15	40636	7	8	877.101	876.094	876.507	-0.4132	173	180	1	K	LGLKFDGK	N
ABC3A_HUMAN	DNA dC->dU-editing enzyme APOBEC-3A OS=Homo sapiens GN=APOBEC3A PE=1 SV=3	31	56	17	23339	6	2	625.33	624.323	624.334	-0.0116	70	74	0	R	HAELR	F
CL054_HUMAN	Uncharacterized protein C12orf54 OS=Homo sapiens GN=C12orf54 PE=2 SV=2	31	56	17	14590	6	2	625.33	624.323	624.36	-0.0368	110	114	0	R	IHNLK	T	Deamidated (NQ)	0.00200.0
CWC22_HUMAN	Pre-mRNA-splicing factor CWC22 homolog OS=Homo sapiens GN=CWC22 PE=1 SV=3	30	56	21	105972	14	1	606.247	605.24	605.284	-0.0446	299	303	0	K	ECGLK	L
S26A8_HUMAN	Testis anion transporter 1 OS=Homo sapiens GN=SLC26A8 PE=1 SV=1	30	56	18	110076	10	1	606.279	605.272	605.24	0.0312	825	829	0	K	NDNSR	Y	Deamidated (NQ)	0.30000.0
AGT2_HUMAN	Alanine--glyoxylate aminotransferase 2, mitochondrial OS=Homo sapiens GN=AGXT2 PE=1 SV=1	30	56	20	58088	7	2	634.316	633.309	633.396	-0.0875	418	422	1	K	FAKLR	D
RAN_HUMAN	GTP-binding nuclear protein Ran OS=Homo sapiens GN=RAN PE=1 SV=3	30	56	21	24579	6	9	1202.69	1201.68	1201.61	0.0716	2	12	0	M	AAQGEPQVQFK	L
SLAI2_HUMAN	SLAIN motif-containing protein 2 OS=Homo sapiens GN=SLAIN2 PE=1 SV=2	29	56	24	62733	19	4	650.023	649.016	649.271	-0.255	573	577	0	K	DDSWK	D
LMA2L_HUMAN	VIP36-like protein OS=Homo sapiens GN=LMAN2L PE=1 SV=1	29	56	28	39913	14	1	606.222	605.215	605.295	-0.0808	17	21	0	R	CLSAR	D
CRBB3_HUMAN	Beta-crystallin B3 OS=Homo sapiens GN=CRYBB3 PE=1 SV=4	29	56	24	24351	7	1	626.256	625.249	625.345	-0.0961	202	205	1	K	WHKR	G
K2C1B_HUMAN	Keratin, type II cytoskeletal 1b OS=Homo sapiens GN=KRT77 PE=2 SV=3	29	56	24	62149	14	5	684.227	683.22	683.324	-0.1041	371	376	0	R	HGDDLK	N
TBB4B_HUMAN	Tubulin beta-4B chain OS=Homo sapiens GN=TUBB4B PE=1 SV=1	28	56	31	50255	16	20	1039.59	1038.59	1038.59	0.0005	310	318	0	R	YLTVAAVFR	G
NRAP_HUMAN	Nebulin-related-anchoring protein OS=Homo sapiens GN=NRAP PE=1 SV=2	28	56	33	197920	36	1	606.222	605.215	605.299	-0.0848	1397	1401	0	K	MAWAK	K
DUS22_HUMAN	Dual specificity protein phosphatase 22 OS=Homo sapiens GN=DUSP22 PE=1 SV=1	28	56	35	21182	9	11	810.473	809.466	809.305	0.161	1	7	0	-	MGNGMNK	I	Acetyl (Protein N-term); Deamidated (NQ); Oxidation (M)	1.3020000.0
POTEE_HUMAN	POTE ankyrin domain family member E OS=Homo sapiens GN=POTEE PE=2 SV=3	28	56	30	122882	20	2	631.353	630.346	630.37	-0.0243	892	896	0	K	ILTER	G
TRMB_HUMAN	tRNA (guanine-N(7)-)-methyltransferase OS=Homo sapiens GN=METTL1 PE=1 SV=1	28	56	34	31622	9	1	626.256	625.249	625.345	-0.0961	171	174	1	K	HKWR	I
K1C10_HUMAN	Keratin, type I cytoskeletal 10 OS=Homo sapiens GN=KRT10 PE=1 SV=6	28	56	36	59020	12	10	1107.57	1106.56	1106.5	0.0551	148	156	0	K	VTMQNLNDR	L	Deamidated (NQ); Oxidation (M)	0.003200000.0
STAU2_HUMAN	Double-stranded RNA-binding protein Staufen homolog 2 OS=Homo sapiens GN=STAU2 PE=1 SV=1	28	56	36	62829	13	3	644.365	643.358	643.365	-0.0076	28	32	0	K	LLNER	G
SCLT1_HUMAN	Sodium channel and clathrin linker 1 OS=Homo sapiens GN=SCLT1 PE=1 SV=2	27	56	43	81203	10	2	634.316	633.309	633.333	-0.0246	593	597	1	K	EETKK	L
T10B_HUMAN	Mitochondrial import inner membrane translocase subunit Tim10 B OS=Homo sapiens GN=TIMM10B PE=1 SV=1	27	56	43	11807	4	8	877.101	876.094	876.457	-0.3628	56	62	0	K	LIHSNHR	L	Deamidated (NQ)	0.0000300.0
ACBP_HUMAN	Acyl-CoA-binding protein OS=Homo sapiens GN=DBI PE=1 SV=2	27	56	40	10038	5	7	881.302	880.295	880.381	-0.0867	2	8	0	M	SQAEFEK	A	Acetyl (Protein N-term); Deamidated (NQ)	1.0200000.0
PHAR1_HUMAN	Phosphatase and actin regulator 1 OS=Homo sapiens GN=PHACTR1 PE=1 SV=3	27	56	42	66723	10	3	634.284	633.277	633.363	-0.0865	143	147	1	R	KISMR	Q
IGKC_HUMAN	Ig kappa chain C region OS=Homo sapiens GN=IGKC PE=1 SV=1	27	56	44	11773	4	2	625.33	624.323	624.275	0.0472	76	80	0	K	ADYEK	H
KCJ14_HUMAN	ATP-sensitive inward rectifier potassium channel 14 OS=Homo sapiens GN=KCNJ14 PE=1 SV=1	26	56	45	48670	1	8	10866.5	10865.5	10865.4	0.0958	88	187	1	R	WMCLLFSCSFLASWLLFGLAFWLIASLHGDLAAPPPPAPCFSHVASFLAAFLFALETQTSIGYGVRSVTEECPAAVAAVVLQCIAGCVLDAFVVGAVMAK	M	Deamidated (NQ); 2 Oxidation (M)	0.0300000000000000000000000000000000000000000000000000000002000000000000000000000000000000000000000300.0
CP11A_HUMAN	Cholesterol side-chain cleavage enzyme, mitochondrial OS=Homo sapiens GN=CYP11A1 PE=1 SV=2	26	56	48	60178	7	2	634.316	633.309	633.29	0.0183	461	465	0	R	QCLGR	R	Deamidated (NQ)	0.30000.0
MYG_HUMAN	Myoglobin OS=Homo sapiens GN=MB PE=1 SV=2	26	56	54	17230	4	4	672.089	671.082	671.412	-0.3301	47	51	1	K	FKHLK	S
KCNH6_HUMAN	Potassium voltage-gated channel subfamily H member 6 OS=Homo sapiens GN=KCNH6 PE=1 SV=1	26	56	56	111166	9	2	634.316	633.309	633.308	0.0005	670	675	0	K	SSADVR	A
DECR_HUMAN	2,4-dienoyl-CoA reductase, mitochondrial OS=Homo sapiens GN=DECR1 PE=1 SV=1	26	56	51	36330	11	12	816.449	815.442	815.418	0.024	156	162	0	R	LSPNAWK	T	Deamidated (NQ)	0.0002000.0
MCUB_HUMAN	Calcium uniporter regulatory subunit MCUb, mitochondrial OS=Homo sapiens GN=MCUB PE=1 SV=2	26	56	45	39285	7	1	606.247	605.24	605.284	-0.0445	1	4	0	-	MLQR	G	Acetyl (Protein N-term); Deamidated (NQ); Oxidation (M)	2.13889
PARK7_HUMAN	Protein deglycase DJ-1 OS=Homo sapiens GN=PARK7 PE=1 SV=2	26	56	46	20050	6	3	634.284	633.277	633.327	-0.0501	1	5	1	-	MASKR	A	Acetyl (Protein N-term)	1.00000.0
DTD2_HUMAN	Probable D-tyrosyl-tRNA(Tyr) deacylase 2 OS=Homo sapiens GN=DTD2 PE=2 SV=1	26	56	52	18877	6	1	606.247	605.24	605.259	-0.0194	136	140	0	K	CAEAR	V
RL39L_HUMAN	60S ribosomal protein L39-like OS=Homo sapiens GN=RPL39L PE=1 SV=3	26	56	56	6289	4	2	631.353	630.346	630.279	0.0662	1	5	0	-	MSSHK	T	Acetyl (Protein N-term)	1.00000.0
ECHD3_HUMAN	Enoyl-CoA hydratase domain-containing protein 3, mitochondrial OS=Homo sapiens GN=ECHDC3 PE=1 SV=2	26	56	57	32955	8	9	976.473	975.466	975.542	-0.0765	68	76	0	R	NALSLAMLK	S	Oxidation (M)	0.000000300.0
RBX1_HUMAN	E3 ubiquitin-protein ligase RBX1 OS=Homo sapiens GN=RBX1 PE=1 SV=1	26	56	57	12722	4	4	650.055	649.048	649.38	-0.3322	22	26	1	R	FEVKK	W
ZFPL1_HUMAN	Zinc finger protein-like 1 OS=Homo sapiens GN=ZFPL1 PE=1 SV=2	25	56	67	34833	1	7	9640.48	9639.47	9639.63	-0.1577	122	212	1	K	LATVNWARAGLGLPLIDEVVSPEPEPLNTSDFSDWSSFNASSTPGPEEVDSASAAPAFYSQAPRPPASPGRPEQHTVIHMGNPEPLTHAPR	K	2 Deamidated (NQ); Oxidation (M)	0.0000200000000000000000000002000000000000000000000000000000000000000000000000000300000000000.0
CO8G_HUMAN	Complement component C8 gamma chain OS=Homo sapiens GN=C8G PE=1 SV=3	25	56	61	22435	4	5	703.222	702.215	702.391	-0.1765	143	149	0	R	AGQLSVK	L	Deamidated (NQ)	0.0030000.0
NIN_HUMAN	Ninein OS=Homo sapiens GN=NIN PE=1 SV=4	25	56	64	245208	44	7	672.017	671.01	671.458	-0.4484	1472	1477	0	R	VTILVK	Q
MNDA_HUMAN	Myeloid cell nuclear differentiation antigen OS=Homo sapiens GN=MNDA PE=1 SV=1	25	56	68	46092	16	3	634.259	633.252	633.349	-0.0969	219	224	0	K	ATAPFK	Y
VILL_HUMAN	Villin-like protein OS=Homo sapiens GN=VILL PE=2 SV=3	25	56	68	96418	18	1	606.222	605.215	605.303	-0.0887	496	501	0	R	AGHHGK	G
RM11_HUMAN	39S ribosomal protein L11, mitochondrial OS=Homo sapiens GN=MRPL11 PE=1 SV=1	25	56	62	20727	5	9	861.098	860.091	860.512	-0.4212	172	179	0	R	AIFLAAQK	E
PARVB_HUMAN	Beta-parvin OS=Homo sapiens GN=PARVB PE=1 SV=1	25	56	60	41745	9	6	795.477	794.47	794.381	0.0887	18	24	0	K	DESFLGK	L
COPB_HUMAN	Coatomer subunit beta OS=Homo sapiens GN=COPB1 PE=1 SV=3	25	56	67	108214	15	6	795.477	794.47	794.305	0.1646	680	685	0	K	NEMNCK	E
COG8_HUMAN	Conserved oligomeric Golgi complex subunit 8 OS=Homo sapiens GN=COG8 PE=1 SV=2	25	56	68	69008	10	3	634.284	633.277	633.36	-0.0831	247	251	0	K	FLQAR	D
SKOR2_HUMAN	SKI family transcriptional corepressor 2 OS=Homo sapiens GN=SKOR2 PE=1 SV=2	24	56	72	105311	2	3	6405.17	6404.17	6404.29	-0.1232	1	61	0	-	MASSPLPGPNDILLASPSSAFQPDTLSQPRPGHANLKPNQVGQVILYGIPIVSLVIDGQER	L	5 Deamidated (NQ)	0.0000000002000000000002000002000000200020000000000000000000000.0
MD2BP_HUMAN	MAD2L1-binding protein OS=Homo sapiens GN=MAD2L1BP PE=1 SV=1	24	56	80	31545	2	2	5661.99	5660.99	5660.62	0.3726	2	52	1	M	AAPEAEVLSSAAVPDLEWYEKSEETHASQIELLETSSTQEPLNASEAFCPR	D	Acetyl (Protein N-term); 2 Deamidated (NQ)	1.000000000000000000000000000020000000002000000000000.0
ENVT1_HUMAN	Endogenous retrovirus group S71 member 1 Env polyprotein OS=Homo sapiens GN=ERVS71-1 PE=2 SV=1	24	56	90	69438	2	7	9640.48	9639.47	9639.55	-0.0787	335	424	1	R	ALTIGDVSGNASCLISTGYNLSASPFQATCNQSLLTSISTSVSYQAPNNTWLACTSGLTRCINGTEPGPLLCVLVHVLPQVYVYSGPEGR	Q	9 Deamidated (NQ)	0.000000000200000000020000002000220000000000002002200000000000002000000000000000000000000000.0
PPR17_HUMAN	Protein phosphatase 1 regulatory subunit 17 OS=Homo sapiens GN=PPP1R17 PE=1 SV=2	24	56	75	17968	5	4	650.055	649.048	649.274	-0.2264	37	41	0	K	DCDLK	K
PISD_HUMAN	Phosphatidylserine decarboxylase proenzyme, mitochondrial OS=Homo sapiens GN=PISD PE=2 SV=4	24	56	80	47155	11	2	623.302	622.295	622.319	-0.024	86	89	1	K	YRER	E
PHS2_HUMAN	Pterin-4-alpha-carbinolamine dehydratase 2 OS=Homo sapiens GN=PCBD2 PE=1 SV=4	24	56	84	14413	8	5	656.034	655.027	655.438	-0.4113	14	19	0	R	LLAALR	G
RGPD4_HUMAN	RanBP2-like and GRIP domain-containing protein 4 OS=Homo sapiens GN=RGPD4 PE=2 SV=3	24	56	90	198648	29	2	623.302	622.295	622.263	0.0315	1195	1199	0	R	AEEMK	S	Oxidation (M)	0.00030.0
ZN623_HUMAN	Zinc finger protein 623 OS=Homo sapiens GN=ZNF623 PE=2 SV=2	24	56	80	63064	8	1	606.247	605.24	605.354	-0.114	411	415	0	K	AFLQK	A
CLC2B_HUMAN	C-type lectin domain family 2 member B OS=Homo sapiens GN=CLEC2B PE=1 SV=2	24	56	75	17752	5	2	634.316	633.309	633.306	0.003	142	145	0	K	WICR	K
PRVA_HUMAN	Parvalbumin alpha OS=Homo sapiens GN=PVALB PE=1 SV=2	24	56	72	12051	5	11	1132.56	1131.55	1131.57	-0.0229	47	55	1	K	VFHMLDKDK	S
IC1_HUMAN	Plasma protease C1 inhibitor OS=Homo sapiens GN=SERPING1 PE=1 SV=2	24	56	82	55347	10	12	1179.63	1178.62	1178.6	0.0169	381	390	1	K	AIMEKLEMSK	F
SNX20_HUMAN	Sorting nexin-20 OS=Homo sapiens GN=SNX20 PE=1 SV=1	24	56	82	36668	8	1	626.256	625.249	625.366	-0.1173	298	302	0	R	RPTPR	G
STAG1_HUMAN	Cohesin subunit SA-1 OS=Homo sapiens GN=STAG1 PE=1 SV=3	24	56	86	145305	19	3	644.365	643.358	643.376	-0.0188	954	958	1	K	ELARR	F
ST1A1_HUMAN	Sulfotransferase 1A1 OS=Homo sapiens GN=SULT1A1 PE=1 SV=3	24	56	86	34257	8	1	626.256	625.249	625.416	-0.1676	17	22	0	K	GVPLIK	Y
SRP09_HUMAN	Signal recognition particle 9 kDa protein OS=Homo sapiens GN=SRP9 PE=1 SV=2	24	56	88	10219	6	12	1179.63	1178.62	1178.52	0.097	77	86	1	K	EARNVTMETE	-
REPS2_HUMAN	RalBP1-associated Eps domain-containing protein 2 OS=Homo sapiens GN=REPS2 PE=1 SV=2	24	56	77	72002	8	3	656.16	655.153	655.333	-0.1802	308	312	0	K	NFFTK	S
RAB36_HUMAN	Ras-related protein Rab-36 OS=Homo sapiens GN=RAB36 PE=2 SV=2	24	56	80	36813	5	9	1202.69	1201.68	1201.63	0.053	2	12	0	M	VIAGASWMLGR	A	Acetyl (Protein N-term)	1.00000000000.0
REL2_HUMAN	Prorelaxin H2 OS=Homo sapiens GN=RLN2 PE=1 SV=1	24	56	84	21428	4	4	672.089	671.082	671.408	-0.3261	132	136	1	K	LIRNR	Q	Deamidated (NQ)	0.00030.0
SRPRB_HUMAN	Signal recognition particle receptor subunit beta OS=Homo sapiens GN=SRPRB PE=1 SV=3	24	56	88	29912	5	1	606.279	605.272	605.277	-0.0052	2	7	0	M	ASADSR	R
RYDEN_HUMAN	Repressor of yield of DENV protein OS=Homo sapiens GN=RYDEN PE=1 SV=2	24	56	90	33773	6	2	634.316	633.309	633.327	-0.0181	28	33	0	K	AGALMR	K	Oxidation (M)	0.000020.0
2A5D_HUMAN	Serine/threonine-protein phosphatase 2A 56 kDa regulatory subunit delta isoform OS=Homo sapiens GN=PPP2R5D PE=1 SV=1	24	56	90	70289	8	3	656.16	655.153	655.449	-0.2966	567	571	1	K	VLLRR	K
CASPA_HUMAN	Caspase-10 OS=Homo sapiens GN=CASP10 PE=1 SV=3	24	56	88	59597	8	8	842.559	841.552	841.404	0.1475	299	305	1	K	DRQGTHK	D	Deamidated (NQ)	0.0020000.0
S26A9_HUMAN	Solute carrier family 26 member 9 OS=Homo sapiens GN=SLC26A9 PE=1 SV=1	23	56	97	87673	2	5	8598.39	8597.38	8597.5	-0.1135	67	147	1	K	IKDYIIPDLLGGLSGGSIQVPQGMAFALLANLPAVNGLYSSFFPLLTYFFLGGVHQMVPGTFAVISILVGNICLQLAPESK	F	4 Deamidated (NQ); Oxidation (M)	0.000000000000000000200203000000200002000000000000000000000000000000000000000000000.0
LAT4_HUMAN	Large neutral amino acids transporter small subunit 4 OS=Homo sapiens GN=SLC43A2 PE=1 SV=1	23	56	100	63618	3	1	5369.18	5368.17	5368.59	-0.4174	199	245	0	K	LIYDAGVSFIVVLVVWAGCSGLVFLNCFFNWPLEPFPGPEDMDYSVK	I	2 Deamidated (NQ)	0.00000000000000000000000002000200000000000000000.0
K1C19_HUMAN	Keratin, type I cytoskeletal 19 OS=Homo sapiens GN=KRT19 PE=1 SV=4	23	56	100	44079	9	10	1107.57	1106.56	1106.49	0.0664	82	90	0	K	LTMQNLNDR	L	3 Deamidated (NQ)	0.000220200.0
ZN677_HUMAN	Zinc finger protein 677 OS=Homo sapiens GN=ZNF677 PE=2 SV=1	23	56	100	69720	13	4	650.039	649.032	649.274	-0.2424	235	239	0	K	NICNK	Y	2 Deamidated (NQ)	0.20020.0
ACTBL_HUMAN	Beta-actin-like protein 2 OS=Homo sapiens GN=ACTBL2 PE=1 SV=2	23	56	110	42318	8	2	631.353	630.346	630.37	-0.0243	193	197	0	K	ILTER	G
GUAD_HUMAN	Guanine deaminase OS=Homo sapiens GN=GDA PE=1 SV=1	23	56	110	51484	10	10	1107.57	1106.56	1106.56	-0.0031	436	445	0	R	NIEEVYVGGK	Q
IF2P_HUMAN	Eukaryotic translation initiation factor 5B OS=Homo sapiens GN=EIF5B PE=1 SV=4	23	56	92	139198	23	1	606.222	605.215	605.302	-0.0873	264	268	1	K	KDQSK	Q	Deamidated (NQ)	0.00200.0
R10B1_HUMAN	Radial spoke head 10 homolog B OS=Homo sapiens GN=RSPH10B PE=2 SV=1	23	56	100	101255	20	1	606.222	605.215	605.328	-0.1138	537	541	0	K	GNLFR	E
ZNF45_HUMAN	Zinc finger protein 45 OS=Homo sapiens GN=ZNF45 PE=2 SV=2	23	56	110	80472	18	1	606.222	605.215	605.295	-0.0808	70	74	0	K	MATQR	D
HESX1_HUMAN	Homeobox expressed in ES cells 1 OS=Homo sapiens GN=HESX1 PE=1 SV=1	23	56	92	21681	4	5	703.222	702.215	702.355	-0.1401	139	144	0	R	EDLAQK	L
CASP5_HUMAN	Caspase-5 OS=Homo sapiens GN=CASP5 PE=1 SV=3	23	56	97	50388	7	1	606.279	605.272	605.266	0.0061	2	7	0	M	AEDSGK	K
CIPC_HUMAN	CLOCK-interacting pacemaker OS=Homo sapiens GN=CIPC PE=1 SV=2	23	56	100	42951	6	3	656.16	655.153	655.34	-0.1874	311	315	1	R	QSKHR	R	Deamidated (NQ)	0.30000.0
DR4L2_HUMAN	Dehydrogenase/reductase SDR family member 4-like 2 OS=Homo sapiens GN=DHRS4L2 PE=2 SV=1	23	56	100	24798	5	10	1515.83	1514.82	1514.84	-0.0201	135	148	1	K	TLDINVKAPALMTK	A	Deamidated (NQ)	0.00003000000000.0
VPS51_HUMAN	Vacuolar protein sorting-associated protein 51 homolog OS=Homo sapiens GN=VPS51 PE=1 SV=2	23	56	110	86901	9	1	606.279	605.272	605.34	-0.068	239	242	1	R	QRFR	E
MNDA_HUMAN	Myeloid cell nuclear differentiation antigen OS=Homo sapiens GN=MNDA PE=1 SV=1	23	56	110	46092	7	2	634.316	633.309	633.349	-0.0399	219	224	0	K	ATAPFK	Y
UVSSA_HUMAN	UV-stimulated scaffold protein A OS=Homo sapiens GN=UVSSA PE=1 SV=2	23	56	110	81340	8	4	672.089	671.082	671.408	-0.3261	612	616	1	R	RQLQK	Q
MKNK1_HUMAN	MAP kinase-interacting serine/threonine-protein kinase 1 OS=Homo sapiens GN=MKNK1 PE=1 SV=1	23	56	110	52051	12	4	650.023	649.016	649.274	-0.2584	319	323	0	R	VCQNK	L	2 Deamidated (NQ)	0.00220.0
DUX3_HUMAN	Putative double homeobox protein 3 OS=Homo sapiens GN=DUX3 PE=2 SV=1	23	56	110	22402	7	3	644.365	643.358	643.329	0.0288	116	120	1	R	RDPQK	G	Deamidated (NQ)	0.00020.0
CIART_HUMAN	Circadian-associated transcriptional repressor OS=Homo sapiens GN=CIART PE=1 SV=1	23	56	110	41702	8	1	626.256	625.249	625.355	-0.106	207	211	0	K	HQLTK	H
NIM1_HUMAN	Serine/threonine-protein kinase NIM1 OS=Homo sapiens GN=NIM1K PE=1 SV=1	23	56	97	49917	7	3	634.284	633.277	633.333	-0.0566	162	167	0	K	ISTEGK	L
ZN621_HUMAN	Zinc finger protein 621 OS=Homo sapiens GN=ZNF621 PE=2 SV=1	23	56	100	50199	7	7	684.241	683.234	683.36	-0.1265	256	261	0	R	LHTGEK	L
LRP3_HUMAN	Low-density lipoprotein receptor-related protein 3 OS=Homo sapiens GN=LRP3 PE=2 SV=2	22	56	110	85397	9	1	606.247	605.24	605.307	-0.067	589	592	1	R	QMRR	H	Oxidation (M)	0.208333
NTAS1_HUMAN	Putative uncharacterized protein NTM-AS1 OS=Homo sapiens GN=NTM-AS1 PE=5 SV=1	22	56	120	15407	4	1	606.247	605.24	605.307	-0.067	30	34	1	R	GMRSR	F
TBB2B_HUMAN	Tubulin beta-2B chain OS=Homo sapiens GN=TUBB2B PE=1 SV=1	22	56	120	50377	14	21	1053.61	1052.61	1052.6	0.0039	310	318	0	R	YLTVAAIFR	G
DDX18_HUMAN	ATP-dependent RNA helicase DDX18 OS=Homo sapiens GN=DDX18 PE=1 SV=2	22	56	130	75702	15	3	634.259	633.252	633.297	-0.0452	292	297	0	R	SAEAQK	L	Deamidated (NQ)	0.000020.0
DJC17_HUMAN	DnaJ homolog subfamily C member 17 OS=Homo sapiens GN=DNAJC17 PE=1 SV=1	22	56	140	34780	10	6	666.007	665	665.35	-0.3499	30	34	1	K	AYRQK	A	Deamidated (NQ)	0.00020.0
GSTM3_HUMAN	Glutathione S-transferase Mu 3 OS=Homo sapiens GN=GSTM3 PE=1 SV=3	22	56	120	26998	6	4	650.055	649.048	649.391	-0.3434	83	87	1	R	YIARK	H
UB2D1_HUMAN	Ubiquitin-conjugating enzyme E2 D1 OS=Homo sapiens GN=UBE2D1 PE=1 SV=1	22	56	120	16819	4	1	606.247	605.24	605.302	-0.0623	129	133	1	K	SDKEK	Y
ABCD1_HUMAN	ATP-binding cassette sub-family D member 1 OS=Homo sapiens GN=ABCD1 PE=1 SV=2	22	56	120	83398	9	1	606.247	605.24	605.307	-0.067	709	712	1	K	MQRR	L	Oxidation (M)	2.08333
PCM1_HUMAN	Pericentriolar material 1 protein OS=Homo sapiens GN=PCM1 PE=1 SV=4	22	56	120	230046	24	2	631.353	630.346	630.345	0.0008	588	593	0	R	SAANIR	A
CH037_HUMAN	Protein C8orf37 OS=Homo sapiens GN=C8orf37 PE=1 SV=1	22	56	130	23993	6	8	945.56	944.553	944.475	0.0778	24	31	1	R	RGMVEQPK	G	Deamidated (NQ)	0.00000200.0
MRAP2_HUMAN	Melanocortin-2 receptor accessory protein 2 OS=Homo sapiens GN=MRAP2 PE=1 SV=2	22	56	130	23648	7	4	650.039	649.032	649.285	-0.2536	1	5	0	-	MSAQR	L	Acetyl (Protein N-term); Oxidation (M)	1.30000.0
LMCD1_HUMAN	LIM and cysteine-rich domains protein 1 OS=Homo sapiens GN=LMCD1 PE=1 SV=1	22	56	130	42004	9	6	795.477	794.47	794.378	0.0919	46	51	1	K	ICKSCK	C
VAX1_HUMAN	Ventral anterior homeobox 1 OS=Homo sapiens GN=VAX1 PE=1 SV=1	22	56	140	35034	8	7	881.302	880.295	880.423	-0.1278	122	128	0	R	CQYVVGR	E
ZN823_HUMAN	Zinc finger protein 823 OS=Homo sapiens GN=ZNF823 PE=2 SV=2	22	56	140	72790	11	5	684.227	683.22	683.36	-0.1405	241	246	0	R	IHTGEK	A
HABP4_HUMAN	Intracellular hyaluronan-binding protein 4 OS=Homo sapiens GN=HABP4 PE=1 SV=1	22	56	110	45872	6	3	656.16	655.153	655.376	-0.2238	179	183	0	R	DRPLR	G
CH082_HUMAN	UPF0598 protein C8orf82 OS=Homo sapiens GN=C8orf82 PE=1 SV=2	22	56	120	24273	4	3	656.16	655.153	655.376	-0.2238	80	84	0	R	LRPNR	S	Deamidated (NQ)	0.00030.0
VILL_HUMAN	Villin-like protein OS=Homo sapiens GN=VILL PE=2 SV=3	22	56	120	96418	8	1	606.279	605.272	605.303	-0.0317	496	501	0	R	AGHHGK	G
AL1L1_HUMAN	Cytosolic 10-formyltetrahydrofolate dehydrogenase OS=Homo sapiens GN=ALDH1L1 PE=1 SV=2	22	56	130	99622	8	6	776.305	775.298	775.401	-0.1033	175	181	0	K	GMVQAVR	L	Oxidation (M)	0.0200000.0
Z385B_HUMAN	Zinc finger protein 385B OS=Homo sapiens GN=ZNF385B PE=1 SV=1	22	56	130	50945	7	1	606.279	605.272	605.354	-0.082	402	406	0	K	LAFQK	D
FA69A_HUMAN	Protein FAM69A OS=Homo sapiens GN=FAM69A PE=2 SV=1	22	56	140	49961	6	2	634.316	633.309	633.333	-0.0246	143	148	0	R	GTTVQK	F	Deamidated (NQ)	0.000030.0
OGG1_HUMAN	N-glycosylase/DNA lyase OS=Homo sapiens GN=OGG1 PE=1 SV=2	22	56	140	39214	6	1	606.279	605.272	605.329	-0.0568	127	131	0	K	FQGVR	L
TRNK1_HUMAN	TPR and ankyrin repeat-containing protein 1 OS=Homo sapiens GN=TRANK1 PE=2 SV=4	22	56	140	340341	17	1	606.279	605.272	605.266	0.0061	1682	1686	0	K	TDENK	D
NPY_HUMAN	Pro-neuropeptide Y OS=Homo sapiens GN=NPY PE=1 SV=1	22	56	140	10902	3	6	776.305	775.298	775.401	-0.1033	1	6	1	-	MLGNKR	L	Acetyl (Protein N-term); Oxidation (M)	1.200000.0
RN207_HUMAN	RING finger protein 207 OS=Homo sapiens GN=RNF207 PE=1 SV=2	22	56	140	72184	7	5	703.222	702.215	702.341	-0.1261	572	578	0	R	NNAASAR	N
F117B_HUMAN	Protein FAM117B OS=Homo sapiens GN=FAM117B PE=1 SV=2	22	56	140	62500	7	4	672.089	671.082	671.371	-0.2897	288	292	0	R	QQLQR	S
SMAG1_HUMAN	Protein Smaug homolog 1 OS=Homo sapiens GN=SAMD4A PE=1 SV=3	22	56	140	80049	13	1	626.256	625.249	625.272	-0.0229	1	4	0	-	MMFR	D	Acetyl (Protein N-term)	1.0000.0
KTHY_HUMAN	Thymidylate kinase OS=Homo sapiens GN=DTYMK PE=1 SV=4	22	56	140	23976	6	4	650.039	649.032	649.311	-0.2788	177	182	0	K	MVDASK	S
ARHL2_HUMAN	Poly(ADP-ribose) glycohydrolase ARH3 OS=Homo sapiens GN=ADPRHL2 PE=1 SV=1	22	56	140	39264	6	5	666.028	665.021	665.302	-0.2813	141	146	0	R	AQFNGK	G	2 Deamidated (NQ)	0.020200.0
HPCL4_HUMAN	Hippocalcin-like protein 4 OS=Homo sapiens GN=HPCAL4 PE=1 SV=3	22	56	140	22359	6	2	625.33	624.323	624.291	0.032	29	32	0	K	QWYK	G	Deamidated (NQ)	1.38889
LSM1_HUMAN	U6 snRNA-associated Sm-like protein LSm1 OS=Homo sapiens GN=LSM1 PE=1 SV=1	22	56	140	15170	4	11	913.514	912.507	912.514	-0.0074	119	126	1	K	DRGLSIPR	A
HXB4_HUMAN	Homeobox protein Hox-B4 OS=Homo sapiens GN=HOXB4 PE=1 SV=2	22	56	140	27986	5	8	842.559	841.552	841.502	0.0496	223	229	1	K	LPNTKIR	S	Deamidated (NQ)	0.0020000.0
YF016_HUMAN	Putative UPF0607 protein ENSP00000332738 OS=Homo sapiens PE=3 SV=3	21	56	150	38001	6	1	606.247	605.24	605.266	-0.0259	144	148	0	K	NQTDK	A	Deamidated (NQ)	0.20000.0
K1143_HUMAN	Uncharacterized protein KIAA1143 OS=Homo sapiens GN=KIAA1143 PE=1 SV=2	21	56	160	17455	5	1	606.247	605.24	605.302	-0.0623	133	137	1	K	KNSQK	Q	2 Deamidated (NQ)	0.02020.0
MCP1_HUMAN	Putative metaphase chromosome protein 1 OS=Homo sapiens GN=HSMCR30 PE=5 SV=1	21	56	170	32961	7	1	606.247	605.24	605.354	-0.114	169	173	0	R	LAQFK	A
IF4E2_HUMAN	Eukaryotic translation initiation factor 4E type 2 OS=Homo sapiens GN=EIF4E2 PE=1 SV=1	21	56	180	28458	6	4	650.055	649.048	649.303	-0.2554	38	43	0	K	NQSSSK	R
TTC16_HUMAN	Tetratricopeptide repeat protein 16 OS=Homo sapiens GN=TTC16 PE=2 SV=2	21	56	150	99103	13	5	684.227	683.22	683.419	-0.1993	770	774	1	R	QRPRK	V
SKA1_HUMAN	Spindle and kinetochore-associated protein 1 OS=Homo sapiens GN=SKA1 PE=1 SV=1	21	56	150	29807	8	7	672.017	671.01	671.433	-0.4233	17	22	1	K	IGNIKK	T
CNDP1_HUMAN	Beta-Ala-His dipeptidase OS=Homo sapiens GN=CNDP1 PE=1 SV=4	21	56	150	56784	13	1	606.222	605.215	605.266	-0.0509	162	167	0	R	GATDNK	G	Deamidated (NQ)	0.000020.0
ZCH23_HUMAN	Zinc finger CCHC domain-containing protein 23 OS=Homo sapiens GN=ZCCHC23 PE=2 SV=1	21	56	160	14913	7	27	1229.63	1228.62	1228.55	0.0671	121	131	0	R	IDGPQGSCPWL	-
PPR17_HUMAN	Protein phosphatase 1 regulatory subunit 17 OS=Homo sapiens GN=PPP1R17 PE=1 SV=2	21	56	160	17968	7	4	650.023	649.016	649.274	-0.2584	37	41	0	K	DCDLK	K
ZN557_HUMAN	Zinc finger protein 557 OS=Homo sapiens GN=ZNF557 PE=2 SV=2	21	56	160	49850	11	12	816.449	815.442	815.353	0.0887	418	423	1	R	MHNRQM	-
DDX27_HUMAN	Probable ATP-dependent RNA helicase DDX27 OS=Homo sapiens GN=DDX27 PE=1 SV=2	21	56	160	90292	18	5	656.034	655.027	655.376	-0.3498	442	446	0	R	IRPNR	E	Deamidated (NQ)	0.00020.0
TBB5_HUMAN	Tubulin beta chain OS=Homo sapiens GN=TUBB PE=1 SV=2	21	56	160	50095	13	20	1039.59	1038.59	1038.59	0.0005	310	318	0	R	YLTVAAVFR	G
TBB5_HUMAN	Tubulin beta chain OS=Homo sapiens GN=TUBB PE=1 SV=2	21	56	160	50095	13	57	1959.07	1958.06	1957.97	0.0842	104	121	0	K	GHYTEGAELVDSVLDVVR	K
CP062_HUMAN	UPF0505 protein C16orf62 OS=Homo sapiens GN=C16orf62 PE=1 SV=2	21	56	160	110860	19	3	634.259	633.252	633.316	-0.0639	583	587	0	R	VEVCK	C
RGPD3_HUMAN	RanBP2-like and GRIP domain-containing protein 3 OS=Homo sapiens GN=RGPD3 PE=4 SV=2	21	56	160	198732	28	2	623.302	622.295	622.263	0.0315	1195	1199	0	R	AEEMK	S	Oxidation (M)	0.00030.0
MFAP1_HUMAN	Microfibrillar-associated protein 1 OS=Homo sapiens GN=MFAP1 PE=1 SV=2	21	56	170	51927	14	4	650.023	649.016	649.315	-0.2995	149	153	1	R	RGMMR	Q
BAGE4_HUMAN	B melanoma antigen 4 OS=Homo sapiens GN=BAGE4 PE=2 SV=1	21	56	170	4227	4	43	1699.87	1698.86	1698.98	-0.1173	2	18	0	M	AAGAVFLALSAQLLQAR	L
NSA2_HUMAN	Ribosome biogenesis protein NSA2 homolog OS=Homo sapiens GN=NSA2 PE=1 SV=1	21	56	170	30218	10	3	634.259	633.252	633.363	-0.1115	148	152	1	K	RMVTK	V
CCD96_HUMAN	Coiled-coil domain-containing protein 96 OS=Homo sapiens GN=CCDC96 PE=2 SV=2	21	56	170	62958	14	1	606.222	605.215	605.266	-0.0509	178	183	0	R	DGAESK	E
TBA8_HUMAN	Tubulin alpha-8 chain OS=Homo sapiens GN=TUBA8 PE=1 SV=1	21	56	170	50746	12	31	1328.69	1327.68	1327.75	-0.0642	113	123	1	K	ESIDLVLDRIR	K
AGR3_HUMAN	Anterior gradient protein 3 OS=Homo sapiens GN=AGR3 PE=1 SV=1	21	56	160	19273	4	5	703.222	702.215	702.38	-0.1652	161	166	0	R	LIQSEL	-	Deamidated (NQ)	0.003000.0
RAB2B_HUMAN	Ras-related protein Rab-2B OS=Homo sapiens GN=RAB2B PE=1 SV=1	21	56	160	24427	4	6	776.305	775.298	775.39	-0.0921	47	53	0	R	MVNIDGK	Q
WWTR1_HUMAN	WW domain-containing transcription regulator protein 1 OS=Homo sapiens GN=WWTR1 PE=1 SV=1	21	56	150	44244	2	2	5661.99	5660.99	5660.65	0.3375	87	140	1	R	SHSSPASLQLGTGAGAAGSPAQQHAHLRQQSYDVTDELPLPPGWEMTFTATGQR	Y	3 Deamidated (NQ); Oxidation (M)	0.000000002000000000000220000000000000000000000300000000.0
TM6S1_HUMAN	Transmembrane 6 superfamily member 1 OS=Homo sapiens GN=TM6SF1 PE=1 SV=2	21	56	150	42122	2	1	5369.18	5368.17	5367.9	0.2732	1	51	0	-	MSASAATGVFVLSLSAIPVTYVFNHLAAQHDSWTIVGVAALILFLVALLAR	V	Acetyl (Protein N-term); 2 Deamidated (NQ)	1.000000000000000000000002000020000000000000000000000.0
ERIC4_HUMAN	Glutamate-rich protein 4 OS=Homo sapiens GN=ERICH4 PE=4 SV=2	21	56	160	14639	4	6	776.305	775.298	775.369	-0.0709	1	5	0	-	MELWR	Q	Acetyl (Protein N-term)	1.00000.0
SPTA1_HUMAN	Spectrin alpha chain, erythrocytic 1 OS=Homo sapiens GN=SPTA1 PE=1 SV=5	21	56	160	281039	14	2	634.316	633.309	633.291	0.0176	1013	1016	0	K	DWWK	V
MELK_HUMAN	Maternal embryonic leucine zipper kinase OS=Homo sapiens GN=MELK PE=1 SV=3	21	56	170	75507	7	2	634.316	633.309	633.363	-0.0545	251	255	1	K	RISMK	N
ZN350_HUMAN	Zinc finger protein 350 OS=Homo sapiens GN=ZNF350 PE=1 SV=3	21	56	170	61285	6	1	606.279	605.272	605.39	-0.1183	270	274	1	K	AFLKK	S
IGHG1_HUMAN	Ig gamma-1 chain C region OS=Homo sapiens GN=IGHG1 PE=1 SV=1	21	56	180	36596	9	5	656.034	655.027	655.376	-0.3498	222	227	1	K	AKGQPR	E
RBBP9_HUMAN	Putative hydrolase RBBP9 OS=Homo sapiens GN=RBBP9 PE=1 SV=2	21	56	170	21215	5	9	976.473	975.466	975.414	0.0512	145	152	0	K	EQQEVADR	L	2 Deamidated (NQ)	0.02200000.0
SETD9_HUMAN	SET domain-containing protein 9 OS=Homo sapiens GN=SETD9 PE=2 SV=2	21	56	170	34359	8	3	644.365	643.358	643.365	-0.0076	99	103	0	K	LLENR	H
CAV3_HUMAN	Caveolin-3 OS=Homo sapiens GN=CAV3 PE=1 SV=1	21	56	170	17761	5	8	945.56	944.553	944.481	0.0713	31	38	0	K	NINEDIVK	V	Deamidated (NQ)	0.20000000.0
CNTLN_HUMAN	Centlein OS=Homo sapiens GN=CNTLN PE=1 SV=5	21	56	180	162131	20	3	644.365	643.358	643.39	-0.0327	1199	1204	0	R	LNVAVK	E	Deamidated (NQ)	0.020000.0
EXOC4_HUMAN	Exocyst complex component 4 OS=Homo sapiens GN=EXOC4 PE=1 SV=1	21	56	180	111170	15	3	644.365	643.358	643.402	-0.044	309	313	1	K	QIVKR	S	Deamidated (NQ)	0.20000.0
HORM2_HUMAN	HORMA domain-containing protein 2 OS=Homo sapiens GN=HORMAD2 PE=1 SV=2	21	56	180	35718	7	6	795.477	794.47	794.384	0.0853	234	240	0	K	VMTEATK	V	Oxidation (M)	0.0300000.0
C11B1_HUMAN	Cytochrome P450 11B1, mitochondrial OS=Homo sapiens GN=CYP11B1 PE=1 SV=5	21	56	180	57878	7	3	634.284	633.277	633.29	-0.0137	449	453	0	R	QCLGR	R	Deamidated (NQ)	0.20000.0
KAD3_HUMAN	GTP:AMP phosphotransferase AK3, mitochondrial OS=Homo sapiens GN=AK3 PE=1 SV=4	20	56	180	25550	6	1	606.247	605.24	605.313	-0.0736	21	26	0	K	GTVSSR	I
CK5P3_HUMAN	CDK5 regulatory subunit-associated protein 3 OS=Homo sapiens GN=CDK5RAP3 PE=1 SV=2	20	56	180	57227	7	1	606.247	605.24	605.328	-0.0888	84	88	0	K	NIFGR	Y
GFPT2_HUMAN	Glutamine--fructose-6-phosphate aminotransferase [isomerizing] 2 OS=Homo sapiens GN=GFPT2 PE=1 SV=3	20	56	190	77680	9	2	625.33	624.323	624.371	-0.048	290	294	0	K	LSIHR	V
BACD3_HUMAN	BTB/POZ domain-containing adapter for CUL3-mediated RhoA degradation protein 3 OS=Homo sapiens GN=KCTD10 PE=1 SV=1	20	56	190	35809	7	1	606.247	605.24	605.292	-0.0524	309	313	0	R	AHLHQ	-	Deamidated (NQ)	0.00002.0
RFC5_HUMAN	Replication factor C subunit 5 OS=Homo sapiens GN=RFC5 PE=1 SV=1	20	56	190	38757	6	11	913.514	912.507	912.401	0.1056	305	311	0	K	MADIEYR	L	Oxidation (M)	0.3000000.0
ZN382_HUMAN	Zinc finger protein 382 OS=Homo sapiens GN=ZNF382 PE=2 SV=3	20	56	200	65337	7	1	606.247	605.24	605.354	-0.114	416	420	0	K	AFIQK	T
SNW1_HUMAN	SNW domain-containing protein 1 OS=Homo sapiens GN=SNW1 PE=1 SV=1	20	56	210	61514	7	1	606.247	605.24	605.284	-0.0445	326	330	0	R	EMAQK	A
IQCA1_HUMAN	IQ and AAA domain-containing protein 1 OS=Homo sapiens GN=IQCA1 PE=2 SV=1	20	56	210	95566	9	2	625.33	624.323	624.331	-0.0078	181	185	0	R	ALFMK	Q	Oxidation (M)	0.00030.0
NDUBA_HUMAN	NADH dehydrogenase [ubiquinone] 1 beta subcomplex subunit 10 OS=Homo sapiens GN=NDUFB10 PE=1 SV=3	20	56	210	21048	5	6	677.437	676.43	676.321	0.1083	157	161	0	R	MLQER	K	Deamidated (NQ)	0.00200.0
MNS1_HUMAN	Meiosis-specific nuclear structural protein 1 OS=Homo sapiens GN=MNS1 PE=2 SV=2	20	56	210	60704	7	9	861.098	860.091	860.424	-0.3332	116	122	0	R	ENSIELR	E	Deamidated (NQ)	0.0200000.0
SPB4_HUMAN	Serpin B4 OS=Homo sapiens GN=SERPINB4 PE=1 SV=2	20	56	210	44997	8	9	861.098	860.091	860.501	-0.41	231	237	0	K	VLEIPYK	G
ETFR1_HUMAN	Electron transfer flavoprotein regulatory factor 1 OS=Homo sapiens GN=ETFRF1 PE=1 SV=2	20	56	210	10857	5	3	634.284	633.277	633.327	-0.0501	77	81	1	R	AMKQR	Y	Deamidated (NQ)	0.00020.0
SUGP1_HUMAN	SURP and G-patch domain-containing protein 1 OS=Homo sapiens GN=SUGP1 PE=1 SV=2	20	56	210	72540	8	5	666.028	665.021	665.338	-0.3177	420	425	0	K	GLGYEK	G
S35A2_HUMAN	UDP-galactose translocator OS=Homo sapiens GN=SLC35A2 PE=1 SV=1	20	56	190	41453	2	1	5369.18	5368.17	5367.96	0.2157	115	162	1	K	LAVPSLIYTLQNNLQYVAISNLPAATFQVTYQLKILTTALFSVLMLNR	S	Deamidated (NQ)	0.000000000020000000000000000000000000000000000000.0
PRGC1_HUMAN	Peroxisome proliferator-activated receptor gamma coactivator 1-alpha OS=Homo sapiens GN=PPARGC1A PE=1 SV=1	20	56	200	92111	2	3	6405.17	6404.17	6403.73	0.4347	1	56	0	-	MAWDMCNQDSESVWSDIECAALVGEDQPLCPDLPELDLSELDVNDLDTDSFLGGLK	W	Acetyl (Protein N-term); 3 Deamidated (NQ); 2 Oxidation (M)	1.30003022000000000000000000200000000000000000000000000000.0
PO3F2_HUMAN	POU domain, class 3, transcription factor 2 OS=Homo sapiens GN=POU3F2 PE=1 SV=4	20	56	200	47092	2	3	6405.17	6404.17	6404	0.1667	115	169	0	R	GDELHGPGALQQQHQQQQQQQQQQQQQQQQQQQQQRPPHLVHHAANHHPGPGAWR	S	4 Deamidated (NQ)	0.0000000000222020000000000000000000000000000000000000000.0
SL9B1_HUMAN	Sodium/hydrogen exchanger 9B1 OS=Homo sapiens GN=SLC9B1 PE=2 SV=2	20	56	220	56587	2	3	6405.17	6404.17	6404.37	-0.209	53	110	1	K	ETYISCPLRGVLNVIITNGVILFVIWCMTWSILGSEALPGGNLFGLFIIFYSAIIGGK	I	2 Deamidated (NQ)	0.0000000000002000020000000000000000000000000000000000000000.0
F216B_HUMAN	Protein FAM216B OS=Homo sapiens GN=FAM216B PE=2 SV=1	20	56	210	16409	5	1	606.247	605.24	605.313	-0.0736	90	94	1	R	DSTKR	A
NPW_HUMAN	Neuropeptide W OS=Homo sapiens GN=NPW PE=1 SV=2	20	56	210	18094	4	5	666.028	665.021	665.361	-0.3402	36	41	0	K	HVASPR	Y
CCNB1_HUMAN	G2/mitotic-specific cyclin-B1 OS=Homo sapiens GN=CCNB1 PE=1 SV=1	20	56	210	48591	8	3	634.284	633.277	633.334	-0.0575	60	64	1	K	MPMKK	E
FGF13_HUMAN	Fibroblast growth factor 13 OS=Homo sapiens GN=FGF13 PE=1 SV=1	20	56	180	27774	7	6	795.477	794.47	794.359	0.1105	34	40	1	K	GKTSCDK	N
VAMP5_HUMAN	Vesicle-associated membrane protein 5 OS=Homo sapiens GN=VAMP5 PE=1 SV=1	20	56	190	12968	5	9	976.473	975.466	975.47	-0.0038	1	8	0	-	MAGIELER	C	Acetyl (Protein N-term); Oxidation (M)	1.30000000.0
FA45B_HUMAN	Putative protein FAM45B OS=Homo sapiens GN=FAM45BP PE=5 SV=1	20	56	180	40830	5	7	806.322	805.315	805.433	-0.1187	153	160	0	K	AYPAGSIK	D
WAPL_HUMAN	Wings apart-like protein homolog OS=Homo sapiens GN=WAPL PE=1 SV=1	20	56	180	134516	9	1	606.279	605.272	605.277	-0.0052	13	19	0	K	GGNGSSK	F
ITSN2_HUMAN	Intersectin-2 OS=Homo sapiens GN=ITSN2 PE=1 SV=3	20	56	180	194423	31	3	634.259	633.252	633.327	-0.0758	944	948	0	R	GWFPK	S
STX1B_HUMAN	Syntaxin-1B OS=Homo sapiens GN=STX1B PE=1 SV=1	20	56	190	33452	11	1	606.222	605.215	605.284	-0.0696	41	45	0	R	GCIEK	L
DEND_HUMAN	Dendrin OS=Homo sapiens GN=DDN PE=1 SV=3	20	56	200	76406	15	2	623.302	622.295	622.271	0.0237	65	69	0	R	GFQNR	T	2 Deamidated (NQ)	0.00220.0
RECO_HUMAN	Recoverin OS=Homo sapiens GN=RCVRN PE=1 SV=2	20	56	200	23230	7	1	606.222	605.215	605.229	-0.0146	162	166	0	K	NDDDK	L
CO6A5_HUMAN	Collagen alpha-5(VI) chain OS=Homo sapiens GN=COL6A5 PE=1 SV=1	20	56	200	291796	34	1	606.222	605.215	605.266	-0.0509	1600	1605	0	K	GSQGQK	G	2 Deamidated (NQ)	0.002020.0
AN20B_HUMAN	Ankyrin repeat domain-containing protein 20B OS=Homo sapiens GN=ANKRD20A8P PE=2 SV=2	20	56	210	94763	17	4	650.023	649.016	649.255	-0.2397	388	393	0	K	GNNTNK	S	3 Deamidated (NQ)	0.022020.0
KIF27_HUMAN	Kinesin-like protein KIF27 OS=Homo sapiens GN=KIF27 PE=2 SV=1	20	56	210	161324	25	1	606.222	605.215	605.266	-0.0509	821	825	0	K	QQDSK	K	Deamidated (NQ)	0.20000.0
K2C1B_HUMAN	Keratin, type II cytoskeletal 1b OS=Homo sapiens GN=KRT77 PE=2 SV=3	20	56	210	62149	14	8	684.232	683.225	683.324	-0.0991	371	376	0	R	HGDDLK	N
IKKB_HUMAN	Inhibitor of nuclear factor kappa-B kinase subunit beta OS=Homo sapiens GN=IKBKB PE=1 SV=1	20	56	210	87535	16	1	606.222	605.215	605.321	-0.106	615	619	0	K	TVVCK	Q
PCGF1_HUMAN	Polycomb group RING finger protein 1 OS=Homo sapiens GN=PCGF1 PE=1 SV=2	20	56	210	30954	11	1	606.222	605.215	605.321	-0.106	70	74	0	K	SCIVK	Y
RAB37_HUMAN	Ras-related protein Rab-37 OS=Homo sapiens GN=RAB37 PE=1 SV=3	20	56	210	25028	7	22	1077.54	1076.54	1076.53	0.0083	1	11	0	-	MTGTPGAVATR	D	Oxidation (M)	0.30000000000.0
CC105_HUMAN	Coiled-coil domain-containing protein 105 OS=Homo sapiens GN=CCDC105 PE=2 SV=3	20	56	210	57386	13	1	606.222	605.215	605.277	-0.0622	11	15	0	R	SQDTR	V
GNAS2_HUMAN	Guanine nucleotide-binding protein G(s) subunit alpha isoforms short OS=Homo sapiens GN=GNAS PE=1 SV=1	20	56	210	46092	10	6	666.007	665	665.327	-0.3275	390	394	0	R	QYELL	-	Deamidated (NQ)	0.20000.0
CCD91_HUMAN	Coiled-coil domain-containing protein 91 OS=Homo sapiens GN=CCDC91 PE=1 SV=2	20	56	210	50169	11	10	746.381	745.374	745.361	0.0131	358	363	0	K	AIQEQR	K	2 Deamidated (NQ)	0.002020.0
MPP10_HUMAN	U3 small nucleolar ribonucleoprotein protein MPP10 OS=Homo sapiens GN=MPHOSPH10 PE=1 SV=2	20	56	180	78930	8	2	634.316	633.309	633.333	-0.0246	613	618	0	K	TVASEK	L
KLH36_HUMAN	Kelch-like protein 36 OS=Homo sapiens GN=KLHL36 PE=1 SV=1	20	56	190	70821	6	6	776.305	775.298	775.386	-0.0887	322	327	0	K	SEQWVK	E
ICAM4_HUMAN	Intercellular adhesion molecule 4 OS=Homo sapiens GN=ICAM4 PE=1 SV=1	20	56	190	29703	4	5	703.222	702.215	702.402	-0.1877	87	92	1	R	QGKTLR	G	Deamidated (NQ)	0.300000.0
NECA2_HUMAN	N-terminal EF-hand calcium-binding protein 2 OS=Homo sapiens GN=NECAB2 PE=1 SV=1	20	56	190	43623	8	11	1132.56	1131.55	1131.54	0.011	245	254	0	K	EEGLEAQISR	L	Deamidated (NQ)	0.0000002000.0
CLD18_HUMAN	Claudin-18 OS=Homo sapiens GN=CLDN18 PE=2 SV=1	19	56	240	28294	2	2	5661.99	5660.99	5660.65	0.3377	2	51	0	M	STTTCQVVAFLLSILGLAGCIAATGMDMWSTQDLYDNPVTSVFQYEGLWR	S	Acetyl (Protein N-term); Deamidated (NQ); 2 Oxidation (M)	1.00000200000000000000000003030000000000000000000000.0
MD12L_HUMAN	Mediator of RNA polymerase II transcription subunit 12-like protein OS=Homo sapiens GN=MED12L PE=1 SV=2	19	56	240	242704	2	1	5369.18	5368.17	5368.44	-0.2713	1008	1054	1	R	YSFVCNTLMNVCMGHQDAGRINDIANFSSELTACCTVLSSEWLGVLK	A	Deamidated (NQ)	0.00000200000000000000000000000000000000000000000.0
